# Supplementary material for: Oxidative stress enhances tumorigenicity and stem-like features via the activation of the Wnt/β-catenin/MYC/Sox2 axis in ALK-positive anaplastic large-cell lymphoma
Source: PubMed Central journal article supplement (PMC5879562; doi:10.1186/s12885-018-4300-2), 2018-04-02

Additional file 1 figure S1

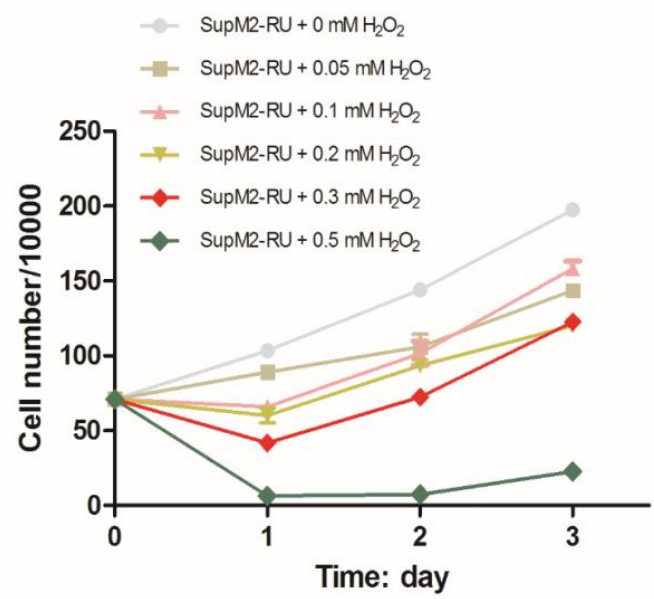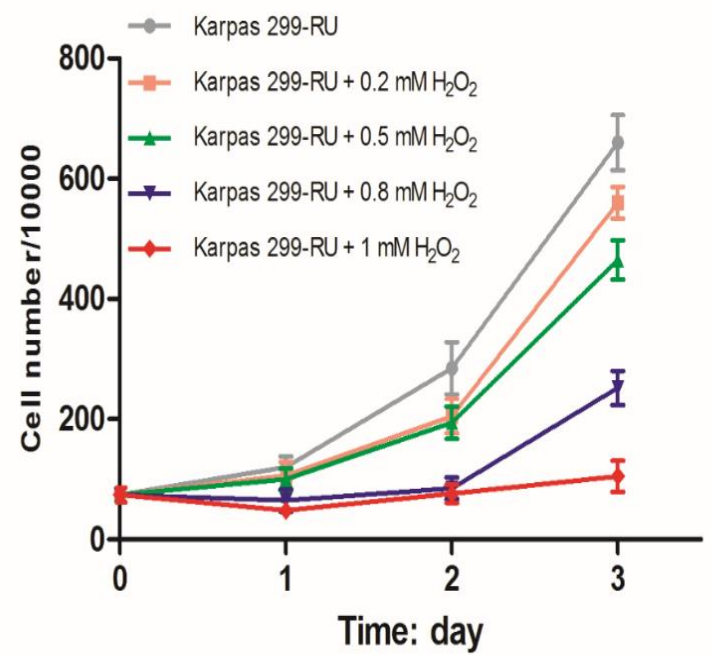

Supplement: 12885_2018_4300_MOESM1_ESM.pdf [file 12885_2018_4300_MOESM1_ESM.pdf]
