# Supplementary material for: Oxidative stress enhances tumorigenicity and stem-like features via the activation of the Wnt/β-catenin/MYC/Sox2 axis in ALK-positive anaplastic large-cell lymphoma
Source: Springer Nature journal article supplement (doi:10.1186/s12885-018-4300-2), 2018-04-02

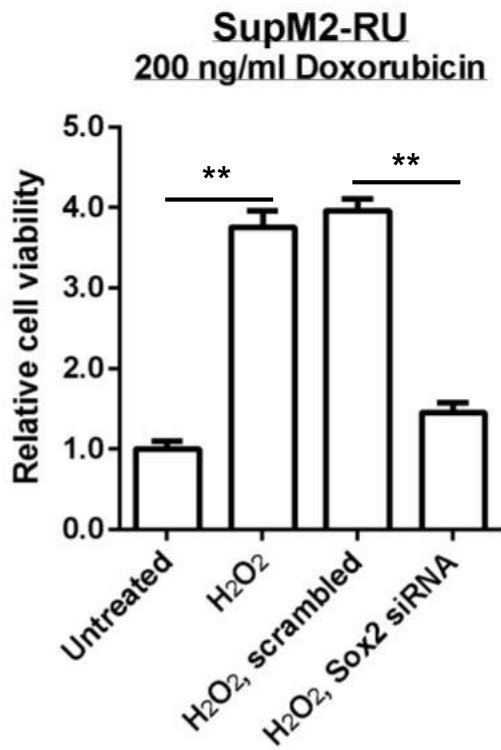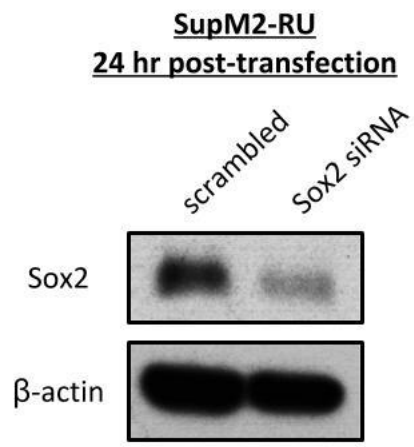

Supplement: MOESM6 [file 15582906]
